# Supplementary material for: Metallothioneins regulate ATP7A trafficking and control cell viability during copper deficiency and excess
Source: PubMed Central journal article supplement (PMC7217913; doi:10.1038/s41598-020-64521-3), 2020-05-12
Supplement: 41598_2020_64521_MOESM1_ESM.pdf [file 41598_2020_64521_MOESM1_ESM.pdf]

## Supplementary Information

### **Metallothioneins regulate ATP7A trafficking and control cell viability during copper deficiency and excess**

Nikita Gudekar<sup>1,2</sup>, Vinit Shanbhag<sup>2,3</sup>, Yanfang Wang<sup>2,4,6</sup>, Martina Ralle<sup>5</sup>, Gary A. Weisman<sup>2,3</sup>,  
and Michael J. Petris<sup>1,2,3,4,\*</sup>

<sup>1</sup>The Genetics Area Program, University of Missouri, Columbia, MO, 65211; <sup>2</sup>The Christopher S. Bond Life Sciences Center, University of Missouri, Columbia, MO, 65211; <sup>3</sup>The Department of Biochemistry, University of Missouri, Columbia, MO, 65211; <sup>4</sup>The Department of Nutrition and Exercise Physiology, University of Missouri, Columbia, MO, 65211; <sup>5</sup>The Department of Molecular and Medical Genetics, Oregon Health & Science University, Portland, Oregon 97239.

<sup>6</sup>Present address: State Key Laboratory of Animal Nutrition, Institute of Animal Science, Chinese Academy of Agricultural Sciences, Beijing, People's Republic of China, 100193.

#### Contents include

- 1) Figure S1
- 2) Figure S2
- 3) Figure S3
- 4) Figure S4
- 5) Figure S5
- 6) Figure S6
- 7) Uncropped western blots

## Supplementary Figure 1

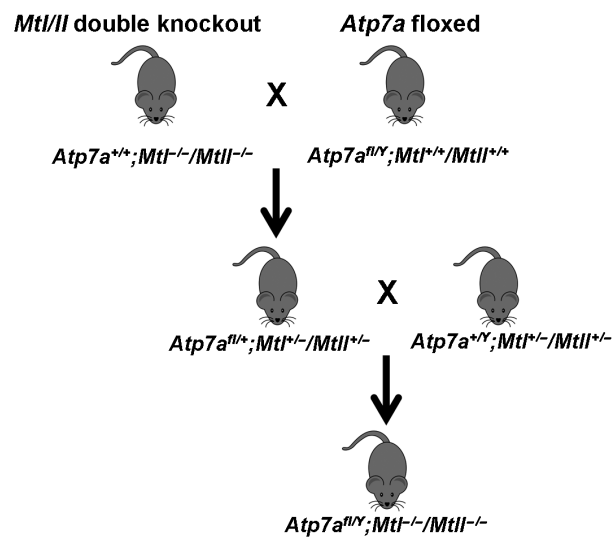

**Fig S1: Breeding strategy used to generate *Atp7a* floxed mice carrying deletions in *Mtl* and *Mtil* genes.** The *Mtl/Il* knockout mice were crossed with *Atp7a* floxed mice to produce F1 offspring that were heterozygous at the *Mtl/Il* locus and either Wt or floxed at the *Atp7a* locus. These mice were crossed to produce male *Atp7a* floxed mice that were homozygous null for the *Mtl/Il* alleles.

## Supplementary Figure 2

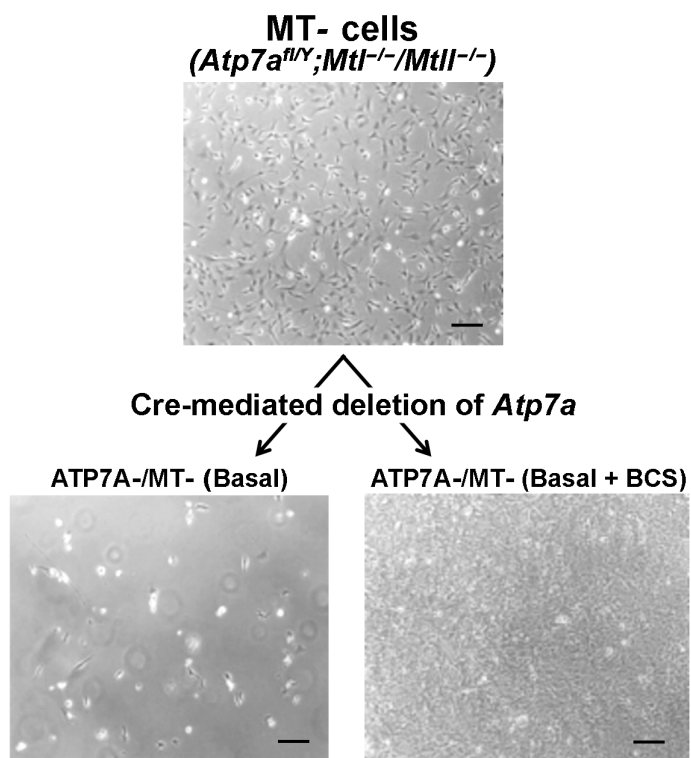

**Fig S2: Deletion of the *Atp7a* gene in MT- cells causes a loss of cell viability that is rescued by Cu chelation.** MT- cells were seeded overnight in basal medium at approximately 30% confluency (top panel), infected with an adenoviral Cre vector to delete the *Atp7a* gene and then cultured for 5 days in basal media with or without 50  $\mu$ M BCS (bottom panels). Images were collected by light microscopy; bars, 50  $\mu$ m.

### Supplementary Figure 3

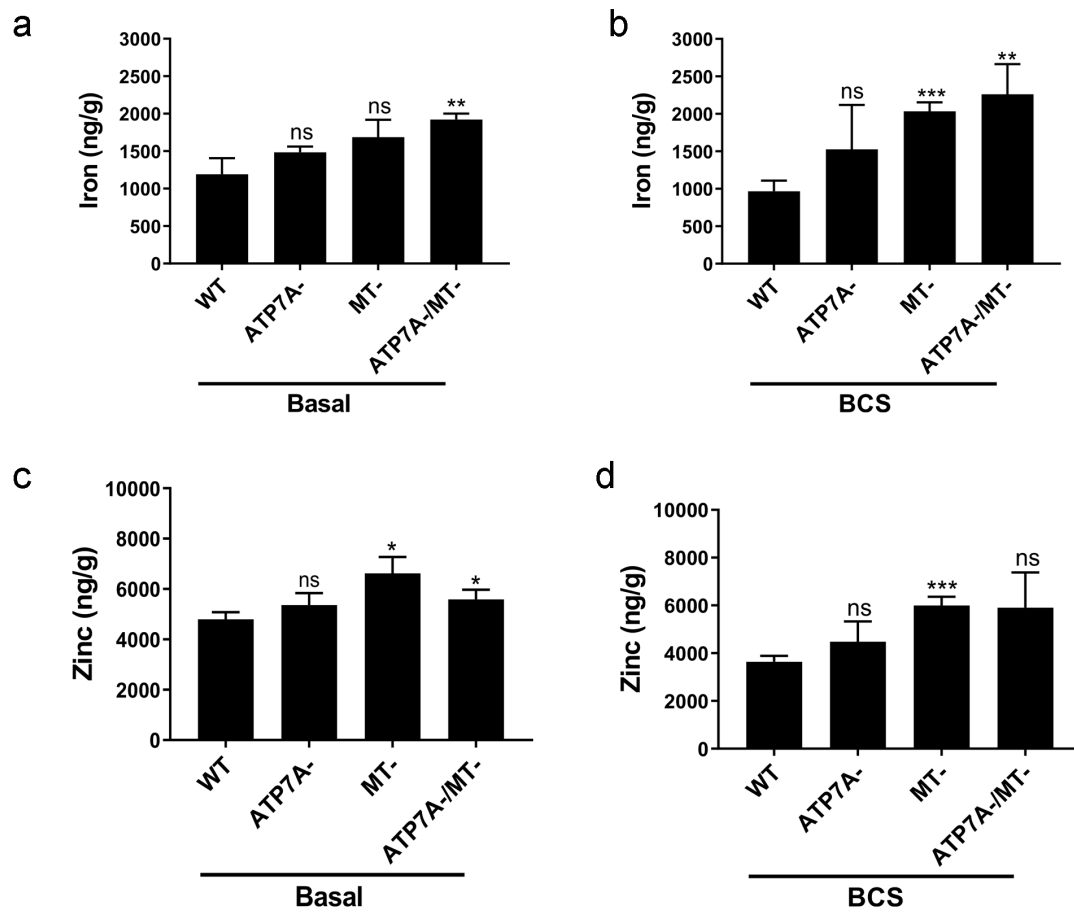

**Fig S3:** Iron (Fe) and Zinc (Zn) concentrations in each cell line were determined by ICP-MS. Cells were grown for 2 days in medium containing 50 μM of the copper chelator BCS and then exposed for 24 h to either basal media (basal) or media supplemented with 50 μM BCS. Values significantly different from WT are indicated (mean ± SEM; \*p < 0.05; \*\*p < 0.01; \*\*\*p < 0.001; ns = not significant).

## Supplementary Figure 4

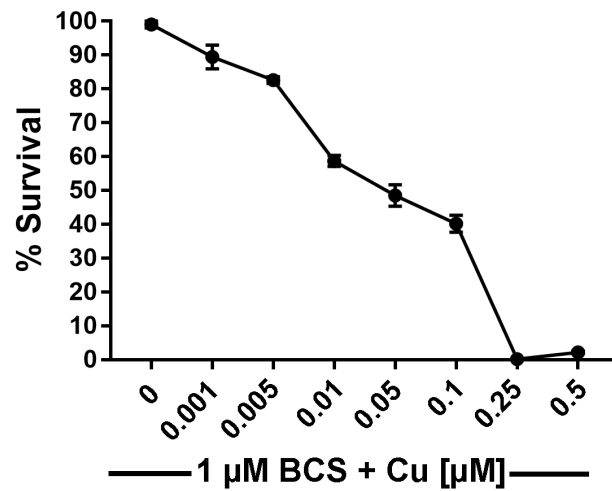

**Fig S4: Deletion of ATP7A and MTI/II causes hypersensitivity to sub-micromolar Cu concentrations.** ATP7A-/MT- cells were seeded into 6-well dishes ( $10^3$  cells per well) and cultured for 6 days in media supplemented with 1  $\mu$ M BCS with or without the indicated concentrations of  $\text{CuCl}_2$ . Surviving cells were quantified using the Crystal Violet assay (mean  $\pm$  SEM).

## Supplementary Figure 5

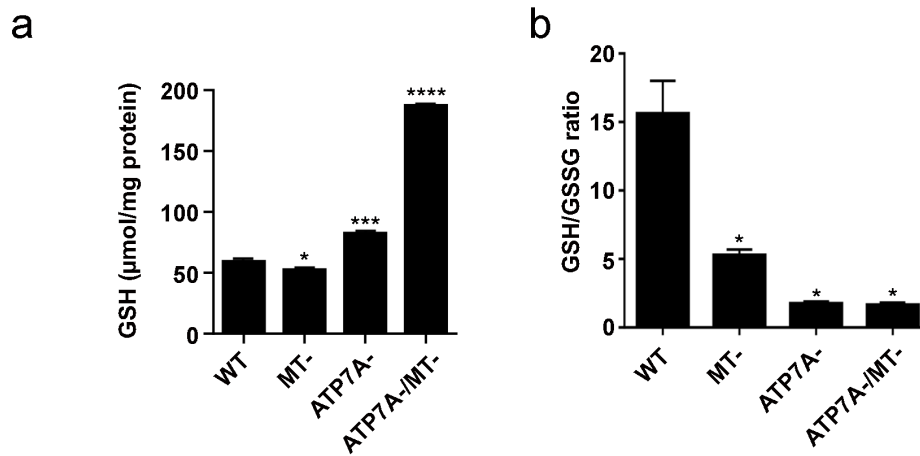

**Fig S5: Deletion of ATP7A and MTI/II increases cellular GSH levels and reduces the ratio of reduced glutathione (GSH) to oxidized glutathione (GSSG).** Cellular GSH per mg total protein (a) and the GSH/GSSG ratio (b) were measured in wild type (WT) and mutant cells cultured for 24 h in basal medium. Values are expressed as the mean  $\pm$  SEM (\*p < 0.05; \*\*\*p < 0.001; \*\*\*\*p < 0.0001; n = 3).

## Supplementary Figure 6

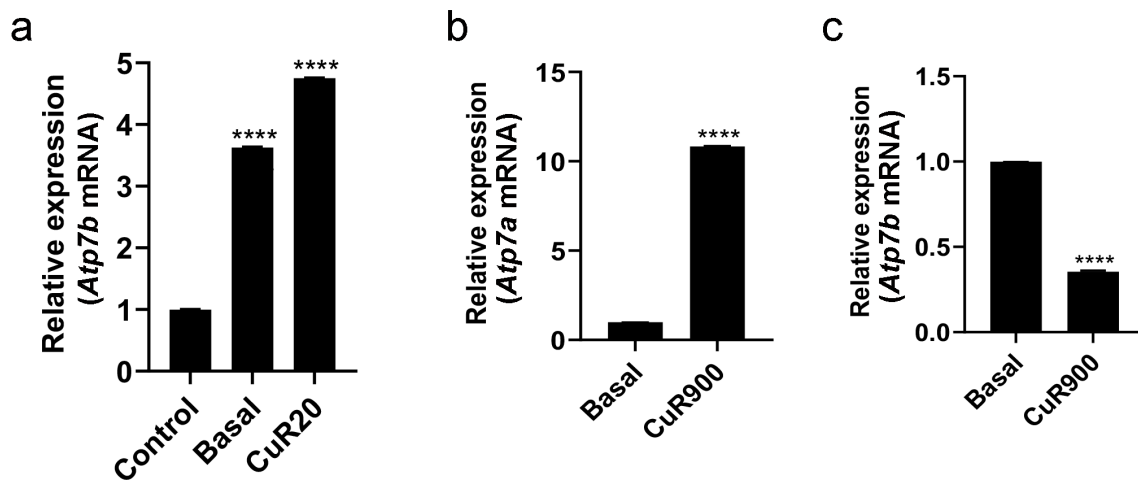

**Fig S6:** Quantitative RT-PCR analysis of *Atp7a* and *Atp7b* mRNA expression in spontaneously Cu resistant cell lines. (a) Parental ATP7A-/MT- (control) cells were selected in either basal medium (basal) or 20  $\mu$ M CuCl<sub>2</sub> (CuR20). Quantitative RT-PCR was used to measure the abundance of *Atp7b* mRNA in each line normalized to *Gapdh* (mean  $\pm$  SEM; \*\*\*\*p < 0.0001; n = 3). (b and c) Parental ATP7A+/MT- cells were grown in either basal medium (basal) or passaged in media containing elevated CuCl<sub>2</sub> until resistance to 900  $\mu$ M was achieved (CuR900). Quantitative RT-PCR was used to measure the abundance of *Atp7a* and *Atp7b* mRNA in each line normalized to *Gapdh* (mean  $\pm$  SEM; \*\*\*\*p < 0.0001; n = 3).

Full length gels and immunoblot from Figure 1

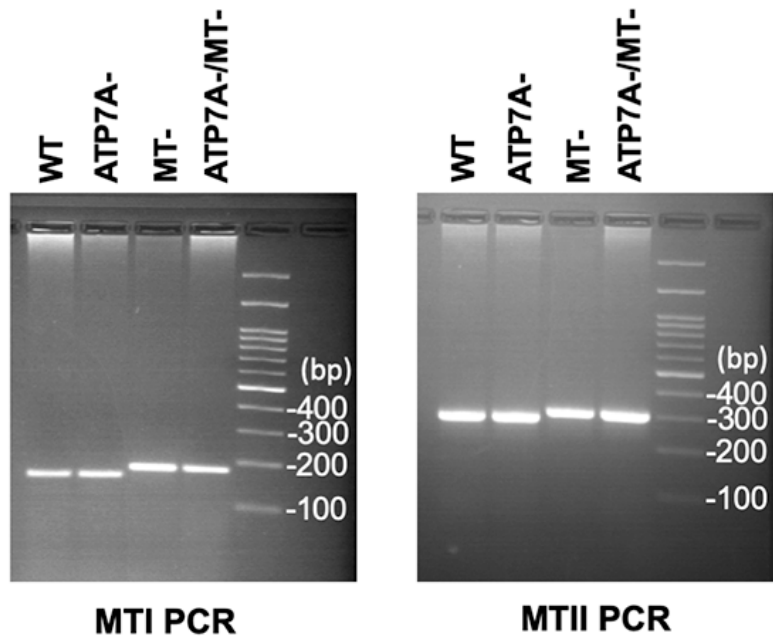

Fig. 1b

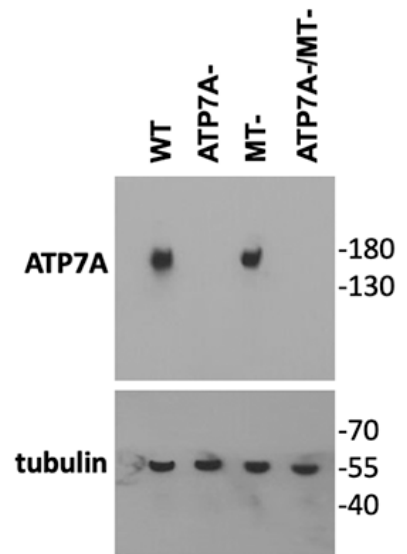

Fig. 1c



Full length immunoblots from Figure 4

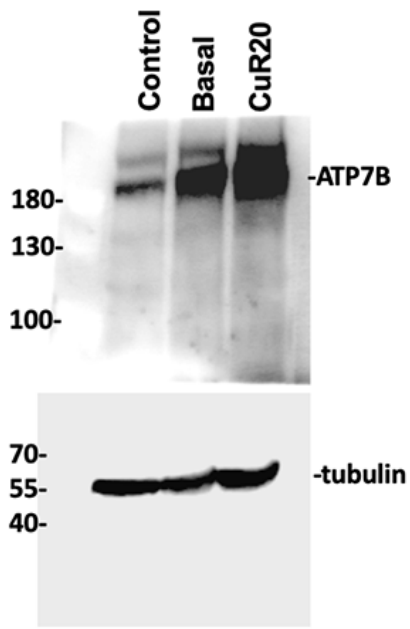

Fig. 4a

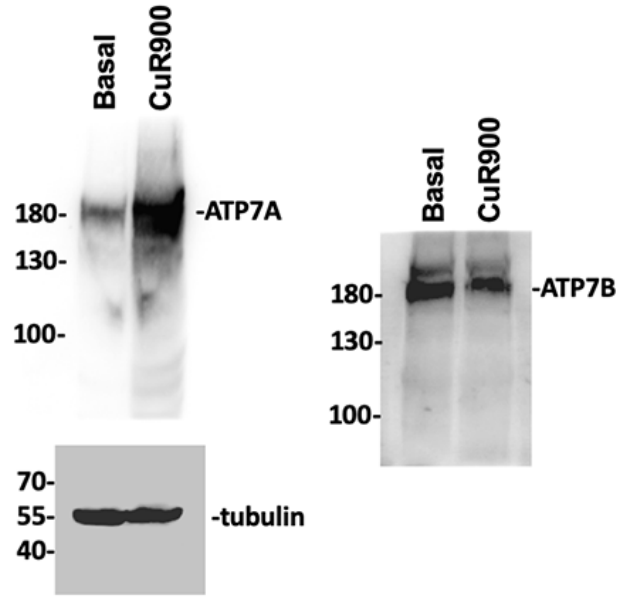

Fig. 4c
